# Supplementary material
Source: PubMed Central journal article supplement (PMC3311358)
Supplement: 1118467109_pnas.201118467SI.pdf [file 1118467109_pnas.201118467SI.pdf]

# Supporting Information

Wincent et al. 10.1073/pnas.1118467109

## SI Materials and Methods

**Materials.** We obtained compounds and products from the following suppliers: 6-formylindolo[3,2-*b*]carbazole (FICZ) from Syntastic AB; H<sub>2</sub>O<sub>2</sub>, ellipticine, genistein, diosmin,  $\alpha$ -naphthoflavone ( $\alpha$ NF), cycloheximide,  $\alpha$ -tocopherol, resorufin, 7-ethoxyresorufin, tryptophan (Trp), and fluorecamine from Sigma-Aldrich; 2,3,7,8-tetrachlorodibenzo-*p*-dioxin (TCDD) from LGC Standards; ketoconazole from Toronto Research Chemicals Inc.; Ultraspec buffer from Nordic BioSite; RevertAid First Strand cDNA synthesis kit from Fermentas; SYBR Green Master Mix from Applied Biosystems; gene-specific primers for quantitative PCR (qPCR) from Invitrogen; human recombinant CYP1A1 Supersomes from BD Bioscience; and alamarBlue viability assay from Invitrogen. Trioxalen was provided by Desiree Edström Wiegleb (Karolinska University Hospital, Stockholm, Sweden) and 3'-methoxy-4'-nitroflavone was a kind gift from Michael S. Denison (University of California, Davis, CA). The immortalized human keratinocyte cell line HaCaT was kindly provided by N. E. Fusenig (Deutsches Krebsforschungszentrum, Heidelberg) and the AHR-silenced HaCaT cell variant by E. Fritsche (Leibniz-Institut für Umwelt-Medizinische Forschung, Düsseldorf, Germany). HEKa cells and all cell-culture reagents were procured from Invitrogen.

**Treatment of Mice.** Female C57BL/6J mice (Scanbur) (three in each group) were treated percutaneously on the back of the right ear with 10 ng FICZ dissolved in 5  $\mu$ L dimethyl sulfoxide (DMSO)/acetone (1:1); control animals received the vehicle only. Treatment started at 07.00 h. At various time points after this administration, the animals were killed with CO<sub>2</sub>, and their livers, adipose tissue (perirenal visceral fat), and right ears were dissected out and placed in liquid nitrogen. This experiment was conducted in accordance with the regulations for animal experimentation at Karolinska Institutet and was preapproved by the Ethical Committee on Animal Experimentation in Stockholm.

**Cell Cultures and Media.** HEKa cells were grown and treated in supplemented medium 154. For HaCaT cells, two other media were used: DMEM 21068 and custom-made DMEM 21068-like medium free from Trp but supplemented with recrystallized, purified Trp at the same concentration (78  $\mu$ M) as in the commercial medium. This latter medium always was prepared shortly before use. HaCaT cells were cultured in DMEM supplemented with 10% (vol/vol) FBS, 2 mM glutamine, 1 mM sodium pyruvate, 100  $\mu$ g streptomycin, 100 IU penicillin/mL, and 0.02 mM calcium chloride. For culturing of HaCaT cells in which the aryl hydrocarbon receptor (AHR) had been silenced or which had been transfected with the empty vector, 800  $\mu$ g Geneticin/mL was added to the culture medium. Medium 154 was supplemented with 0.2% (vol/vol) bovine pituitary extract; 5  $\mu$ g bovine insulin, 0.18  $\mu$ g hydrocortisone, 5  $\mu$ g bovine transferrin, 0.2 ng human epidermal growth factor, 10  $\mu$ g gentamicin, and 0.25  $\mu$ g amphotericin B per milliliter and with 0.04 mM calcium chloride. All culturing was performed at 37 °C under an atmosphere containing 5% CO<sub>2</sub>. Before treatment, HaCaT and HEKa cells were grown for the different periods of time required to attain overconfluence in the routine cell medium supplemented with a higher concentration of calcium chloride (2 mM) to obtain differentiation.

**Recrystallization of Trp.** One gram of Trp was added to 250 mL absolute ethanol, and the solution was brought to boiling with

stirring. More ethanol was added gradually until a saturated solution was obtained; the saturated solution was filtrated, slowly cooled, and left to crystallize at 4 °C. The crystals were collected and washed in absolute ethanol and were dried under vacuum. All procedures were carried out protected from light. Then 25 mg of the recrystallized Trp was dissolved in 50 mL water, concentrated on C18 SepPak cartridges (Waters), and a methanol eluate was analyzed by HPLC (fluorescence) for the presence of FICZ. FICZ in the recrystallized Trp was below the detection limit for this analytical setting (5 fmol).

**Exposure of the Cell Cultures.** With the exception of H<sub>2</sub>O<sub>2</sub>, which was dissolved in water, and  $\alpha$ -tocopherol and trioxalen, which were dissolved in EtOH, all compounds to be tested were dissolved in DMSO and were added to the culture medium to give a final concentration of 0.1% (vol/vol) DMSO or EtOH. For UVB irradiation, UV lamps containing six (Philips TL20W/12RS sunlamps) or two (Philips PL, 36W, UV240 DT, IP20) UV tubes were used. All UVB irradiation of cells was performed in PBS supplemented with calcium and magnesium, and fresh medium was added immediately after irradiation.

**Clearance of FICZ.** To determine the clearance (i.e., metabolism) of FICZ by HaCaT cells, these cells were seeded onto 60-mm dishes and cultured as described above. At 0, 0.25, 0.5, 1.5, 3, 6, and 12 h, samples were taken by removing the medium, rapidly washing the cells with ice-cold PBS, and then harvesting the cells in distilled water. The cells then were sonicated on ice and stored at -20 °C until further analysis by HPLC.

**Ethoxyresorufin Deethylarion Assay.** The ethoxyresorufin deethylase (EROD) activity of isolated fractions containing human recombinant CYP1A1 (10 nM) was assayed by first preincubating with effector for 10 min followed by addition of ethoxyresorufin (1  $\mu$ M) and NADPH (0.5 mM). To analyze CYP1A1-dependent EROD activity of intact living cells, HaCaT or HEKa cells were seeded onto 96-well plates and cultured as described above. At 1.5, 3, 6, 12, and 24 h (Fig. 2B); 1.5, 3, 6, 12, 24, and 48 h (Fig. 3B and 4 and Fig. S2); 1.5 and 3 h (Fig. S3); 1.5, 6, 24, and 48 h (Fig. S5); and 12, 24, and 48 h (Fig. S6), the reaction was terminated by removing the medium and rinsing the cells with PBS. The EROD reaction then was initiated by addition of 2  $\mu$ M 7-ethoxyresorufin in sodium phosphate buffer (50 mM, pH 8.0); then the cells were incubated at 37 °C for 15 min. In both cases formation of resorufin was quantified on a multiwell plate reader with the excitation/emission wavelengths of 535/590 nm; then this activity was expressed relative to the amount of protein present as determined by fluorecamine fluorescence (excitation/emission = 390/485 nm) or by using the DC protein assay kit (BioRad) in accordance with the manufacturer's protocol.

**RT-qPCR.** Total RNA isolated with Ultraspec (Biotex) in accordance with the manufacturer's protocol was subjected to reverse transcription using the RevertAid First Strand cDNA synthesis kit and oligo (dt)<sub>18</sub> primers. Thereafter, SYBR Green Master Mix and gene-specific primers were used for qPCR.  $\beta$ -2-Microglobulin or  $\beta$ -actin was selected as the reference gene, and the results were analyzed with the mathematical model described by Pfaffl and colleagues (1).

**Viability.** Cell viability was assessed with the alamarBlue assay, which is based on the reduction of resazurin to resorufin by metabolically active cells.

**Preparation of Whole-Cell Extracts and Immunoblotting.** HaCaT cells were harvested in cell lysis buffer [25 mM Tris-phosphate (pH 7.8), 2 mM DTT, 2 mM 1,2-diaminocyclohexane- $N,N,N',N'$ -tetraacetic acid, 10% (vol/vol) glycerol, 1% (vol/vol) Triton X-100] supplemented with protease inhibitor mixture (Roche). The proteins in this lysate were separated by 8.7% (wt/vol) SDS/PAGE, transferred onto a nitrocellulose membrane, and subjected to Western blotting with the following antibodies: rabbit anti-AHR (sc-5579) and anti-GAPDH (Santa Cruz Biotechnology) and HRP-conjugated anti-rabbit IgG (DakoCytomation). Finally, the immunoreactive proteins were visualized by enhanced chemiluminescence (Pierce/Thermo Fisher).

**Chemical Analyses of Whole-Cell Lysates and Cell-Culture Media.** The levels of FICZ in whole-cell lysates were analyzed using an in-line solid-phase extraction column coupled to a reverse-phase C18 column. In brief, the cell lysates were injected onto the extraction column, washed with water, and then separated on the analytical C18 column. FICZ was detected using excitation and emission wavelengths of 390 and 525 nm, respectively. With this system,  $\geq 95\%$  recovery was obtained, and the limit of detection for FICZ was 0.05 pmol. The cellular concentration of FICZ was related to protein content as determined by the Coomassie plus protein assay (Pierce), with BSA as the standard.

To avoid light-dependent formation of FICZ during extraction and analysis, all cell culture media were handled in the dark at all times, and the samples were stored in amber vials. Commercial DMEM was extracted at 4 °C using C18 SepPak cartridges (Waters) and subsequently was eluted with ethanol. This eluate then was mixed with an equal volume of water, followed by fractionation and analysis by HPLC (YL9100HPLC equipped with an Agilent 1200 fluorescence detector). Separation in this HPLC system was achieved using a reverse-phase C18 column [Alltech Alltima,  $4.6 \times 250$  mm, particle size (dp) 5  $\mu\text{m}$ ; ScanTec] with a mobile phase consisting of water (A) and acetonitrile (B), both containing 1.5 mM formic acid. Initially, the solvent contained 50% B, with a linear increase to 80% B during a period of 20 min, at a flow rate of 0.8 mL/min.

The FICZ fraction isolated with this semipreparative liquid chromatography (LC) system was analyzed further using in-line concentration and enrichment on a precolumn (ReproSil DIBS-

C4, 5  $\mu\text{m}$ ,  $4.6 \times 100$  mm; Dr. Maisch GmbH), followed by elution onto a separation column (Acquity HSS T3 C18,  $2.1 \times 100$  mm, dp 1.8  $\mu\text{m}$ ; Waters) connected to a quadrupole time-of-flight high-resolution mass spectrometer (QToF Premier; Waters). In this case the solvent was 100% A (5% acetonitrile in water), which was changed linearly to 50% B (5% water in acetonitrile) in 0.5 min, then changed linearly to 100% B in 2.5 min, and then held for 5 min. The flow rate was 0.150 mL/min for the first 0.5 min and 0.300 mL/min for the remaining 10.5 min (including the final 3-min reequilibration). The column temperature was maintained at 65 °C.

The precolumn was fitted to a six-port valve (Rheodyne) to which two LC pumps also were connected. The first pump (HP 1050; Hewlett Packard) was used to load the sample via a manual loop injector equipped with a 4-mL sample loop. The second LC pump, an Acquity ultra performance liquid chromatography system (Waters), was used for gradient elution of the sample, which involved back-flushing it from the precolumn onto the separation column.

The QToF MS was operated in the electrospray ionization negative-ion mode, with the TOF detector in the V-mode. The quadrupole was set to a wide-pass mode, and the collision energy alternated between 2 and 20 eV, using two full-scan MS functions. The duration of each scan was 0.2 s, and the interscan interval was 0.01 s. The mass ranges were 70–350 and 70–300 Thomson (Th) for functions 1 and 2, respectively.

The following settings were used: capillary voltage of 3.0 kV; sampling cone voltage of 35 V; extraction cone voltage of 2.9 V; source temperature of 100 °C, desolvation temperature of 350 °C; cone gas (nitrogen) flow rate of 50 L/h; and desolvation gas (nitrogen) flow rate of 700 L/h. Argon was used as the collision gas, at a flow rate of 0.5 mL/min, to produce a pressure of  $3.5 \times 10^{-3}$  mbar in the collision cell. External mass calibration was performed in the mass range ( $m/z$ ) of 100–1,000 Th, using a series of cluster ions formed from 0.05 M NaOH and 0.5% formic acid dissolved in 2-propanol/ $\text{H}_2\text{O}$  (90:10). Sulfadimethoxine ( $m/z$  309.0658) in methanol (0.1 ng/ $\mu\text{L}$ ) was used as a lockspray solution. The lockspray was monitored once every 5 s (i.e., once after every 12 scans, on average).

1. Pfaffl MW (2001) A new mathematical model for relative quantification in real-time RT-PCR. *Nucleic Acids Res* 29(9):e45.

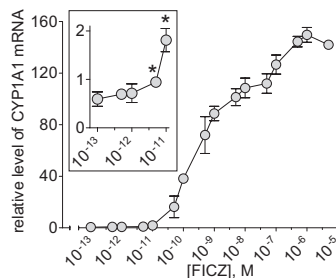

**Fig. S1.** FICZ is a potent inducer of CYP1A1 gene expression in vitro. The levels of CYP1A1 mRNA in HaCaT cells treated for 2 h with different concentrations of FICZ, ranging from 0.1 pM to 10  $\mu\text{M}$ , was determined by qRT-PCR using the  $\beta$ -2-microglobulin housekeeping gene as an internal standard. The experiment was performed in triplicate. Error bars indicate SE, and asterisks denote significant differences ( $*P < 0.05$ ) compared with DMSO-treated cells.

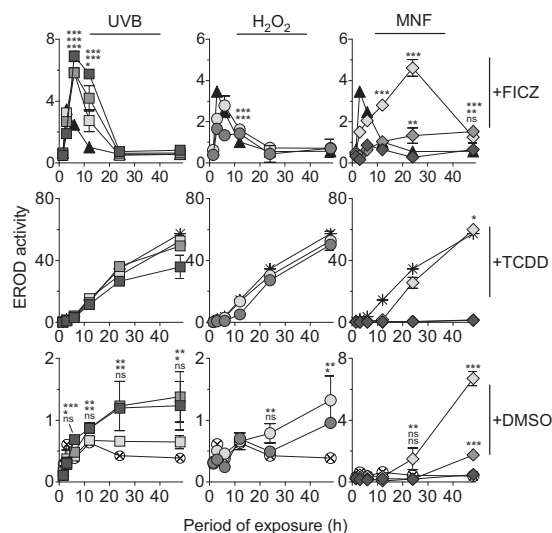

**Fig. 52.** UVB, H<sub>2</sub>O<sub>2</sub>, and 3'-methoxy-4'-nitroflavone (MNF) inhibit and induce CYP1A1 enzyme activity in HEKa cells. Cells were treated with 5 nM FICZ (black triangle) (*Top*), 5 nM TCDD (star) (*Middle*), or DMSO (crossed circle) (*Bottom*), either alone or in combination with 5 mJ/cm<sup>2</sup> (light gray square), 10 mJ/cm<sup>2</sup> (medium gray square), or 20 mJ/cm<sup>2</sup> (dark gray square) UVB, or with 0.2 mM (light gray circle) or 2 mM (medium gray circle) H<sub>2</sub>O<sub>2</sub>, or with 0.05 μM (light gray diamond), 0.5 μM (medium gray diamond), or to 2.5 μM (dark gray diamond) MNF. Treatments were terminated at the indicated time points, and EROD activity (pmol resorufin/mg protein) was measured. All cotreatments inhibited FICZ-dependent EROD activity at early time points ( $P < 0.05$  to  $P < 0.001$ ), and TCDD-dependent EROD activity was inhibited at all time points ( $P < 0.05$  to  $P < 0.001$ ) except for 0.05 μM MNF, which potentiated TCDD-dependent EROD activity at 48 h. Error bars indicate SE. Asterisks indicate statistically increased ( $*P < 0.05$ ;  $**P < 0.01$ ;  $***P < 0.001$ ) EROD activity caused by the different cotreatments together with FICZ, TCDD, and DMSO. ns, nonsignificant.

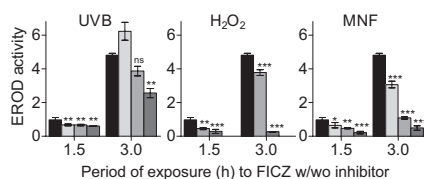

**Fig. 53.** Inhibitors of CYP1A1 cause an initial inhibition of FICZ-induced EROD activity. HaCaT cells were treated with 5 nM FICZ, either alone (black bar) or in combination with 5 mJ/cm<sup>2</sup> (light gray bar), 10 mJ/cm<sup>2</sup> (medium gray bar), or 20 mJ/cm<sup>2</sup> (dark gray bar) UVB (*Left*); or in combination with 0.2 mM (medium gray bar) or 2 mM (dark gray bar) H<sub>2</sub>O<sub>2</sub>; or in combination with 0.05 μM (light gray bar), 0.5 μM (medium gray bar), or 2.5 μM (dark gray bar) MNF. Treatments were terminated at the indicated time points, and EROD activity (pmol resorufin/mg protein) was measured. Error bars indicate SE. Asterisks denote significant differences ( $*P < 0.05$ ;  $**P < 0.01$ ;  $***P < 0.001$ ) between coexposed cells and cells exposed to FICZ alone. ns, nonsignificant.

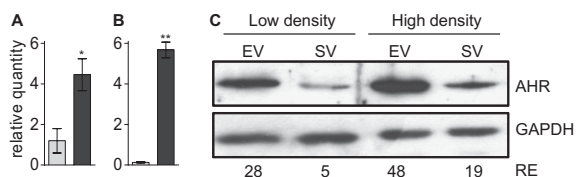

**Fig. 54.** Differentiated HaCaT cells express more AHR protein than do proliferating cells. Relative levels of the differentiation markers involucrin (*A*) and transglutaminase 1 (*B*) in cells grown at high (dark gray bars) or low (light gray bars) cell density were determined by qRT-PCR using the β-actin housekeeping gene as an internal standard.  $n = 2$ . Error bars indicate SD.  $*P < 0.05$ ;  $**P < 0.01$ . (*C*) Western blot analysis of AHR levels in HaCaT cells grown at low or high density was determined in HaCaT cells stably expressing a lentiviral silencing vector (SV) with shRNA sequences for AHR and cells carrying an empty vector (EV). Relative expression (RE) was calculated based on signal intensity of the AHR compared with GAPDH, which was used as an internal standard.

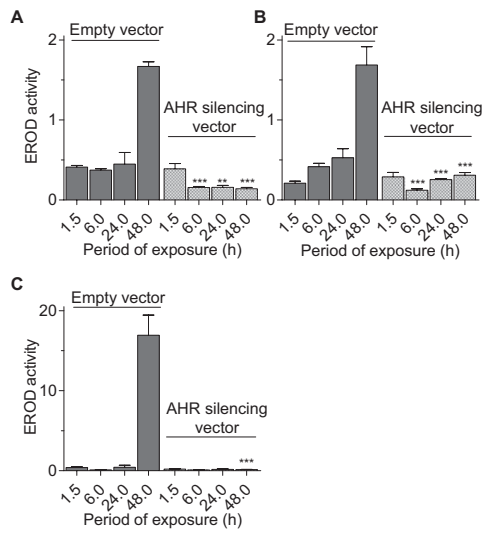

**Fig. S5.** Induction of CYP1A1 enzyme activity by UVB, H<sub>2</sub>O<sub>2</sub>, and MNF in cells cultured in commercial DMEM is AHR dependent. HaCaT cells containing empty vector or AHR silencing vector were treated with (A) 10 mJ/cm<sup>2</sup>UVB, (B) 0.2 mM H<sub>2</sub>O<sub>2</sub>, or (C) 0.5 μM MNF. Treatments were terminated at the indicated time points, and EROD activity (pmol resorufin/mg protein) was measured. Error bars indicate SE. Asterisks denote significant differences (\*\**P* < 0.01; \*\*\**P* < 0.001) between cells containing empty vector and cells containing AHR silencing vector.

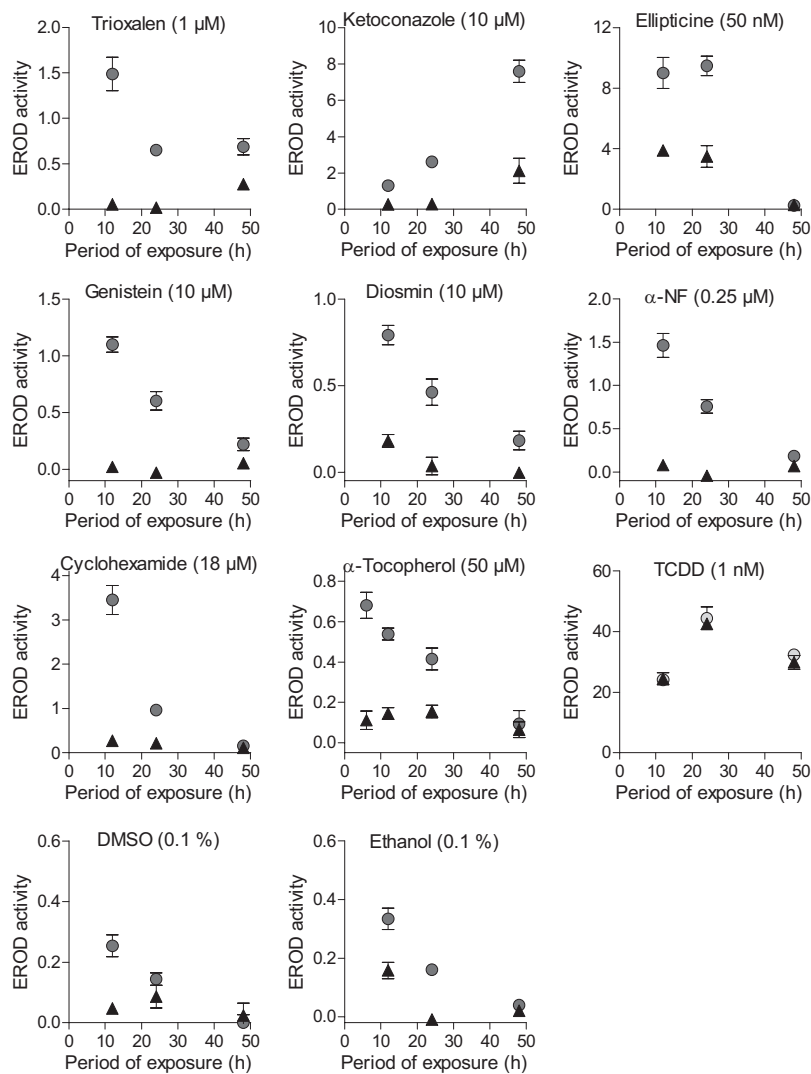

**Fig. S6.** Induction of CYP1A1 enzyme activity by different CYP1 inhibitors requires the presence of Trp derivatives in the culture medium. HaCaT cells were treated with nine different compounds, including TCDD as positive control, in commercial DMEM (gray circle) or in DMEM prepared with recrystallized Trp (black triangle). Treatments were terminated at the indicated time points, and EROD activity (pmol resorufin/mg protein) was measured. Error bars indicate SE.

**Table S1. AHR-activating agents that also inhibit CYP1 enzymes**

| Class                             | Physical or chemical description        | Compound name                                                    | References |
|-----------------------------------|-----------------------------------------|------------------------------------------------------------------|------------|
| Combustion products               | Polycyclic aromatic hydrocarbons        | Anthracene                                                       | (1, 2)     |
|                                   |                                         | Chrysene                                                         | (3, 4)     |
|                                   |                                         | Fluoranthene                                                     | (5, 6)     |
| Clinical drugs                    | Antifertility drugs                     | Phenanthrene                                                     | (2, 7)     |
|                                   |                                         | 3-(2-Ethyl phenyl)-5-(3-methoxy phenyl)-1H-1,2,4triazol (DL111)  | (8)        |
|                                   | Anti-inflammatory drugs                 | Diclofenac                                                       | (9, 10)    |
|                                   |                                         | Leflunomide                                                      | (11, 12)   |
|                                   |                                         | Sulindac                                                         | (13)       |
|                                   | Antiparasitic drugs                     | Albendazole                                                      | (14, 15)   |
|                                   |                                         | Bitertanol                                                       | (16)       |
|                                   |                                         | Clotrimazole                                                     | (17, 18)   |
|                                   |                                         | Enilconazole                                                     | (19)       |
|                                   |                                         | Itraconazole                                                     | (20)       |
|                                   |                                         | Ketoconazole                                                     | (20)       |
|                                   |                                         | Medetomidine                                                     | (21)       |
|                                   |                                         | Miconazole                                                       | (22, 23)   |
|                                   |                                         | Oltipraz                                                         | (24, 25)   |
|                                   |                                         | Primaquine                                                       | (23, 26)   |
|                                   |                                         | Quinine                                                          | (27, 28)   |
|                                   |                                         | Metopropol                                                       | (11, 29)   |
|                                   |                                         | Propranolol                                                      | (9, 29)    |
|                                   |                                         | Timolol                                                          | (11, 29)   |
|                                   | Cytostatics, chemotherapeutic drugs     | 4-Aminophenyl, 2-(4-amino-3-methylphenyl) benzothiazole (DF 203) | (30)       |
|                                   |                                         | Anastrozole                                                      | (11, 31)   |
|                                   |                                         | Doxorubicin                                                      | (32, 33)   |
|                                   |                                         | Ellipticine                                                      | (34, 35)   |
|                                   |                                         | Flutamide                                                        | (36)       |
|                                   |                                         | Dexamethasone                                                    | (37, 38)   |
|                                   |                                         | Ciprofibrate                                                     | (39, 40)   |
|                                   |                                         | Clofibrate                                                       | (41, 42)   |
|                                   |                                         | Fluvastatin                                                      | (43, 44)   |
|                                   | Psoriasis drugs                         | 5-Methoxypsoralen                                                | (45)       |
|                                   |                                         | 8-Methoxypsoralen                                                | (46, 47)   |
|                                   | Proton pump inhibitors                  | Omeprazole                                                       | (48, 49)   |
|                                   | Selective serotonin reuptake inhibitors | Fluoxetine                                                       | (11, 42)   |
|                                   |                                         | Fluvoxamine                                                      | (41, 50)   |
|                                   |                                         | Paroxetine                                                       | (41, 42)   |
|                                   |                                         | Sertraline                                                       | (11, 51)   |
|                                   |                                         | Lipoxin A4                                                       | (52)       |
| Berberine                         |                                         | (53),                                                            |            |
| Caffeine                          |                                         | (54, 55)                                                         |            |
| Endogenous and natural substances | Arachidonic acid metabolites            | Cocaine                                                          | (56, 57)   |
|                                   |                                         | Evodiamine                                                       | (58, 59)   |
|                                   | Alkaloids                               | Harman                                                           | (60, 61)   |
|                                   |                                         | Piperine                                                         | (62)       |
|                                   |                                         | Rutaecarpine                                                     | (58, 63)   |
|                                   |                                         | $\Delta^9$ -Tetrahydrocannabinol                                 | (64)       |
|                                   |                                         | Diallyl sulfide                                                  | (65, 66)   |
|                                   |                                         | Diallyl disulfide                                                | (67, 68)   |
|                                   |                                         | Diallyl trisulfide                                               | (65, 68)   |
|                                   |                                         | Phenethyl isothiocyanate (PEITC)                                 | (69, 70)   |
|                                   |                                         | Sulforaphane                                                     | (71, 72)   |
|                                   |                                         | $\alpha$ -Naphthoflavone ( $\alpha$ NF)                          | (73, 74)   |
|                                   |                                         | Apigenin                                                         | (50, 75)   |
|                                   |                                         | Baicalein                                                        | (76, 77)   |
|                                   |                                         | Biochanin A                                                      | (78)       |
|                                   |                                         | Chrysin                                                          | (77, 79)   |
| Daidzein                          | (77, 80)                                |                                                                  |            |
| Diosmetin                         | (81)                                    |                                                                  |            |
| Diosmin                           | (70, 82)                                |                                                                  |            |
| Ellagic acid                      | (83, 84)                                |                                                                  |            |

Table S1. Cont.

| Class                            | Physical or chemical description             | Compound name                                         | References |
|----------------------------------|----------------------------------------------|-------------------------------------------------------|------------|
|                                  |                                              | Emodin                                                | (77, 85)   |
|                                  |                                              | Epigallocatechin gallate (EGCG)                       | (86)       |
|                                  |                                              | Eugenol                                               | (87, 88)   |
|                                  |                                              | Flavone                                               | (89, 90)   |
|                                  |                                              | Galangin                                              | (89, 91)   |
|                                  |                                              | Hesperetin                                            | (92, 93)   |
|                                  |                                              | Hydroxychalcones                                      | (94, 95)   |
|                                  |                                              | Isorhamnetin                                          | (75, 96)   |
|                                  |                                              | Kaempferol                                            | (75, 96)   |
|                                  |                                              | Luteolin                                              | (75, 79)   |
|                                  |                                              | 3'-Methoxy-4'-nitroflavone (MNF)                      | (97, 98)   |
|                                  |                                              | Phloretin                                             | (99)       |
|                                  |                                              | Quercetin                                             | (100, 101) |
|                                  | Coumarins, furanocoumarins and terpenes      | Angelicin                                             | (102)      |
|                                  |                                              | Bergamottin                                           | (102, 103) |
|                                  |                                              | Isoimpinellin                                         | (104)      |
|                                  |                                              | Limonene                                              | (105)      |
|                                  | Curcuminoids                                 | Curcumin                                              | (106, 107) |
|                                  | Heme metabolites                             | Hemin                                                 | (108, 109) |
|                                  | Indoles                                      | Diindolylmethane (DIM)                                | (69, 110)  |
|                                  |                                              | Indole-3-carbinol (I3C)                               | (110, 111) |
|                                  |                                              | Melatonin                                             | (11, 112)  |
|                                  |                                              | Tryptamine                                            | (113)      |
|                                  | Methylenedioxyben-zenes                      | Isosafrole                                            | (50, 114)  |
|                                  |                                              | Piperonyl butoxide                                    | (115, 116) |
|                                  |                                              | Safrole                                               | (11, 117)  |
|                                  | Stilbenoids                                  | Resveratrol                                           | (23, 70)   |
|                                  | Vitamins and antioxidants                    | Lycopene                                              | (118, 119) |
|                                  |                                              | Menadione                                             | (120, 121) |
|                                  |                                              | Retinoic acid                                         | (121, 122) |
|                                  |                                              | $\alpha$ -Tocopherol                                  | (120, 123) |
|                                  |                                              | 1-O-Hexyl-2,3,5-trimethylhydroquinone                 | (124)      |
|                                  |                                              | Propyl gallate                                        | (125, 126) |
|                                  |                                              | Tert-butylhydroquinone (tBHQ)                         | (68, 124)  |
|                                  |                                              | Tannic acid                                           | (125, 126) |
| Dietary mutagens                 | Heterocyclic amines                          | 2-Amino-3,8-dimethylimidazo[4,5-f]quinoxaline (MeIQx) | (60)       |
|                                  |                                              | 2-Amino-3-methyl-9H-pyrido[2,3-b]indole (MeAa/phaC)   | (60)       |
|                                  |                                              | 3-Amino-1,4-dimethyl-5H-pyrido[4,3-b]indole (Trp-P-1) | (60)       |
| Industrial compounds             | Plastic monomers and additives               | Bisphenol A (BPA)                                     | (127, 128) |
|                                  |                                              | Nonylphenol                                           | (129, 130) |
|                                  |                                              | Polybrominated diphenyl ethers (PBDE)                 | (131, 132) |
|                                  |                                              | Toluene diisocyanate (TDI)                            | (133)      |
| Metals                           |                                              | Cadmium                                               | (134, 135) |
|                                  |                                              | Chromium                                              | (136, 137) |
|                                  |                                              | Copper                                                | (137, 138) |
|                                  |                                              | Mercury                                               | (137, 138) |
| Oxidants                         |                                              | Hyperoxia                                             | (139, 140) |
|                                  |                                              | Oxidized low-density lipoproteins (oxLDL)             | (141, 142) |
|                                  |                                              | Ozone                                                 | (143, 144) |
| Pesticides                       | Ureas                                        | Diuron                                                | (145, 146) |
|                                  |                                              | N-Phenylthiourea (PTU)                                | (147, 148) |
|                                  |                                              | Prochloraz                                            | (149)      |
|                                  | Carbamates                                   | Carbaryl                                              | (150, 151) |
|                                  | Organophosphates                             | Chlorpyrifos                                          | (145, 152) |
|                                  |                                              | Fenitrothion                                          | (145, 153) |
|                                  | Organochlorines                              | Endosulphan                                           | (154, 155) |
| Specific inhibitors and blockers | Corticosteroid synthesis inhibitors          | Metyrapone                                            | (156)      |
|                                  | Carnitine palmitoyl-transferase-1 inhibitors | Etomoxir                                              | (157)      |
|                                  | Cytochrome P4501 suicide inhibitors          | 1-Ethynylpyrene                                       | (158)      |
|                                  |                                              | 2-Phenylphenanthridinone                              | (159)      |
|                                  |                                              | SKF-525                                               | (160, 161) |
|                                  | Kinase inhibitors                            | Genistein                                             | (67, 77)   |
|                                  |                                              | U0126                                                 | (162)      |
|                                  | 5-Lipoxygenase inhibitors                    | Zileuton                                              | (163, 164) |

1. Falahatpisheh M, Kerzee J, Metz R, Donnelly K, Ramos K (2004) Inducible cytochrome P450 activities in renal glomerular mesangial cells: Biochemical basis for antagonistic interactions among nephrocarcinogenic polycyclic aromatic hydrocarbons. *J Carcinog* 3:12.
2. Shimada T, et al. (1998) Selectivity of polycyclic inhibitors for human cytochrome P450s 1A1, 1A2, and 1B1. *Chem Res Toxicol* 11:1048–1056.
3. Elovaara E, et al. (2007) Polycyclic aromatic hydrocarbon (PAH) metabolizing enzyme activities in human lung, and their inducibility by exposure to naphthalene, phenanthrene, pyrene, chrysene, and benzo(a)pyrene as shown in the rat lung and liver. *Arch Toxicol* 81:169–182.
4. Shimada T, et al. (2007) Different mechanisms for inhibition of human cytochromes P450 1A1, 1A2, and 1B1 by polycyclic aromatic inhibitors. *Chem Res Toxicol* 20:489–496.
5. Pushparajah DS, et al. (2007) Up-regulation of CYP1A/B in rat lung and liver, and human liver precision-cut slices by a series of polycyclic aromatic hydrocarbons; association with the Ah locus and importance of molecular size. *Toxicol In Vitro* 22:128–145.
6. Willett KL, Randerath K, Zhou GD, Safe SH (1998) Inhibition of CYP1A1-dependent activity by the polynuclear aromatic hydrocarbon (PAH) fluoranthene. *Biochem Pharmacol* 55:831–839.
7. Oliveira M, Pacheco M, Santos MA (2007) Cytochrome P4501A, genotoxic and stress responses in golden grey mullet (*Liza aurata*) following short-term exposure to phenanthrene. *Chemosphere* 66:1284–1291.
8. Hu YZ, Yao TW (2004) In vitro metabolism and inductive or inhibitive effect of DL111 on rat cytochrome P4501A enzyme. *Chem Biol Interact* 147:109–117.
9. Laville N, Ait-Aïssa S, Gomez E, Casellas C, Porcher JM (2004) Effects of human pharmaceuticals on cytotoxicity, EROD activity and ROS production in fish hepatocytes. *Toxicology* 196: 41–55.
10. Mehinto AC, Hill EM, Tyler CR (2010) Uptake and biological effects of environmentally relevant concentrations of the nonsteroidal anti-inflammatory pharmaceutical diclofenac in rainbow trout (*Oncorhynchus mykiss*). *Environ Sci Technol* 44:2176–2182.
11. Hu W, Sorrentino C, Denison MS, Kolaja K, Fielden MR (2007) Induction of cyp1a1 is a nonspecific biomarker of aryl hydrocarbon receptor activation: Results of large scale screening of pharmaceuticals and toxicants in vivo and in vitro. *Mol Pharmacol* 71:1475–1486.
12. Tan SC, New LS, Chan EC (2008) Prevention of acetaminophen (APAP)-induced hepatotoxicity by leflunomide via inhibition of APAP biotransformation to N-acetyl-p-benzoquinone imine. *Toxicol Lett* 180:174–181.
13. Bass SE, et al. (2009) Novel dithiolethione-modified nonsteroidal anti-inflammatory drugs in human hepatoma HepG2 and colon LS180 cells. *Clin Cancer Res* 15:1964–1972.
14. Baliharová V, et al. (2005) Inhibitory effect of albendazole and its metabolites on cytochromes P450 activities in rat and mouflon in vitro. *Pharmacol Rep* 57:97–106.
15. Souhaili-el Amri H, Fargetton X, Benoit E, Totis M, Batt AM (1988) Inducing effect of albendazole on rat liver drug-metabolizing enzymes and metabolite pharmacokinetics. *Toxicol Appl Pharmacol* 92:141–149.
16. Chan PK, et al. (2006) Induction and inhibition of cytochrome P450-dependent monooxygenases of rats by fungicide bitertanol. *Food Chem Toxicol* 44:2047–2057.
17. Levine SL, Oris JT (1999) Noncompetitive mixed-type inhibition of rainbow trout CYP1A catalytic activity by clotrimazole. *Comp Biochem Physiol C Pharmacol Toxicol Endocrinol* 122: 205–210.
18. Ronis MJ, Ingelman-Sundberg M, Badger TM (1994) Induction, suppression and inhibition of multiple hepatic cytochrome P450 isozymes in the male rat and bobwhite quail (*Colinus virginianus*) by ergosterol biosynthesis inhibiting fungicides (EBIFs). *Biochem Pharmacol* 48:1953–1965.
19. Sergent T, et al. (2009) CYP1A1 induction and CYP3A4 inhibition by the fungicide imazalil in the human intestinal Caco-2 cells-comparison with other conazole pesticides. *Toxicol Lett* 184:159–168.
20. Korashy HM, Shayeganpour A, Brocks DR, El-Kadi AO (2007) Induction of cytochrome P450 1A1 by ketoconazole and itraconazole but not fluconazole in murine and human hepatoma cell lines. *Toxicol Sci* 97:32–43.
21. Lennquist A, Celander MC, Förlin L (2008) Effects of medetomidine on hepatic EROD activity in three species of fish. *Ecotoxicol Environ Saf* 69:74–79.
22. Beijer K, Abrahamson A, Brunström B, Brandt I (2010) CYP1A inhibition in fish gill filaments: A novel assay applied on pharmaceuticals and other chemicals. *Aquat Toxicol* 96: 145–150.
23. Frötschl R, et al. (1998) Prediction of aryl hydrocarbon receptor-mediated enzyme induction of drugs and chemicals by mRNA quantification. *Chem Res Toxicol* 11:1447–1452.
24. Dale Y, Eltom SE (2006) The induction of CYP1A1 by oltipraz is mediated through calcium-dependent-calpain. *Toxicol Lett* 166:150–159.
25. Langouët S, et al. (2000) Inhibition of human cytochrome P450 enzymes by 1,2-dithiole-3-thione, oltipraz and its derivatives, and sulforaphane. *Chem Res Toxicol* 13:245–252.
26. Werlinder V, Backlund M, Zhukov A, Ingelman-Sundberg M (2001) Transcriptional and post-translational regulation of CYP1A1 by primaquine. *J Pharmacol Exp Ther* 297:206–214.
27. Bapiro TE, Andersson TB, Otter C, Hasler JA, Masimirembwa CM (2002) Cytochrome P450 1A1/2 induction by antiparasitic drugs: Dose-dependent increase in ethoxresorufin O-deethylase activity and mRNA caused by quinine, primaquine and albendazole in HepG2 cells. *Eur J Clin Pharmacol* 58:537–542.
28. Ching MS, Blake CL, Malek NA, Angus PW, Ghabrial H (2001) Differential inhibition of human CYP1A1 and CYP1A2 by quinidine and quinine. *Xenobiotica* 31:757–767.
29. Ahokas JT, Davies C, Ravenscroft PJ (1984) Comparison of beta-adrenoceptor antagonists as modulators of drug metabolism: Effect of lipophilicity on microsomal phase I and II reactions. *Br J Clin Pharmacol* 17(Suppl 1):103S–105S.
30. Chua MS, et al. (2000) Role of Cyp1A1 in modulation of antitumor properties of the novel agent 2-(4-amino-3-methylphenyl)benzothiazole (DF 203, NSC 674495) in human breast cancer cells. *Cancer Res* 60:5196–5203.
31. Grimm SW, Dyrhoff MC (1997) Inhibition of human drug metabolizing cytochromes P450 by anastrozole, a potent and selective inhibitor of aromatase. *Drug Metab Dispos* 25: 598–602.
32. Marchand DJ, Renton KW (1981) Depression of cytochrome P-450-dependent drug biotransformation by adriamycin. *Toxicol Appl Pharmacol* 58:83–88.
33. Volkova M, Palmeri M, Russell KS, Russell RR (2011) Activation of the aryl hydrocarbon receptor by doxorubicin mediates cytoprotective effects in the heart. *Cardiovasc Res* 90: 305–314.
34. Aimová D, Stiborová M (2005) Antitumor drug ellipticine inhibits the activities of rat hepatic cytochromes P450. *Biomed Pap Med Fac Univ Palacky Olomouc Czech Repub* 149: 437–440.
35. Gasiewicz TA, Kende AS, Rucci G, Whitney B, Willey JJ (1996) Analysis of structural requirements for Ah receptor antagonist activity: Ellipticines, flavones, and related compounds. *Biochem Pharmacol* 52:1787–1803.
36. Westerink WM, Stevenson JC, Schoonen WG (2008) Pharmacologic profiling of human and rat cytochrome P450 1A1 and 1A2 induction and competition. *Arch Toxicol* 82:909–921.
37. Wiebel FJ, Cikryt P (1990) Dexamethasone-mediated potentiation of P4501A1 induction in H4IIEC3T hepatoma cells is dependent on a time-consuming process and associated with induction of the Ah receptor. *Chem Biol Interact* 76:307–320.
38. Vrzal R, et al. (2009) Dexamethasone controls aryl hydrocarbon receptor (AhR)-mediated CYP1A1 and CYP1A2 expression and activity in primary cultures of human hepatocytes. *Chem Biol Interact* 179:288–296.
39. Laignelet L, Narbonne JF, Lhuguenot JC, Riviere JL (1989) Induction and inhibition of rat liver cytochrome(s) P-450 by an imidazole fungicide (prochloraz). *Toxicology* 59:271–284.
40. Lupp A, Karge E, Deufel T, Oelschlägers H, Fleck C (2008) Ciprofibrate, clofibric acid and respective glycinate derivatives. Effects of a four-week treatment on male lean and obese Zucker rats. *Arzneimittelforschung* 58:225–241.
41. Thibaut R, Porte C (2008) Effects of fibrates, anti-inflammatory drugs and antidepressants in the fish hepatoma cell line PLHC-1: Cytotoxicity and interactions with cytochrome P450 1A. *Toxicol In Vitro* 22:1128–1135.
42. Thibaut R, Schnell S, Porte C (2006) The interference of pharmaceuticals with endogenous and xenobiotic metabolizing enzymes in carp liver: An in-vitro study. *Environ Sci Technol* 40:5154–5160.
43. Cohen LH, van Leeuwen RE, van Thiel GC, van Pelt JF, Yap SH (2000) Equally potent inhibitors of cholesterol synthesis in human hepatocytes have distinguishable effects on different cytochrome P450 enzymes. *Biopharm Drug Dispos* 21:353–364.
44. Kocarek TA, Reddy AB (1996) Regulation of cytochrome P450 expression by inhibitors of hydroxymethylglutaryl-coenzyme A reductase in primary cultured rat hepatocytes and in rat liver. *Drug Metab Dispos* 24:1197–1204.
45. Letteron P, et al. (1986) Inactivation and induction of cytochrome P-450 by various psoralen derivatives in rats. *J Pharmacol Exp Ther* 238:685–692.
46. Bickers DR, Mukhtar H, Molica SJ, Jr., Pathak MA (1982) The effect of psoralens on hepatic and cutaneous drug metabolizing enzymes and cytochrome P-450. *J Invest Dermatol* 79: 201–205.
47. Gwang JH (1996) Induction of rat hepatic cytochrome P4501A and P4502B by the methoxsalen. *Cancer Lett* 109:115–120.
48. Daujat M, et al. (1992) Omeprazole, an inducer of human CYP1A1 and 1A2, is not a ligand for the Ah receptor. *Biochem Biophys Res Commun* 188:820–825.
49. Shizaki K, Ohsako S, Kawanishi M, Yagi T (2008) Omeprazole alleviates benzo(a)pyrene cytotoxicity by inhibition of CYP1A1 activity in human and mouse hepatoma cells. *Basic Clin Pharmacol Toxicol* 103:468–475.
50. Pastrakuljic A, Tang BK, Roberts EA, Kalow W (1997) Distinction of CYP1A1 and CYP1A2 activity by selective inhibition using fluvoxamine and isosafrole. *Biochem Pharmacol* 53: 531–538.
51. Daniel WA, Kot M, Wójcikowski J (2003) Effects of classic and newer antidepressants on the oxidation pathways of caffeine in rat liver. In vitro study. *Pol J Pharmacol* 55:1045–1053.
52. Schaldach CM, Riby J, Bjeldanes LF (1999) Lipoxin A4: A new class of ligand for the Ah receptor. *Biochemistry* 38:7594–7600.
53. Vrzal R, et al. (2005) Activation of the aryl hydrocarbon receptor by berberine in HepG2 and H4IIE cells: Biphasic effect on CYP1A1. *Biochem Pharmacol* 70:925–936.
54. Goasduff T, Dréano Y, Guillois B, Ménez JF, Berthou F (1996) Induction of liver and kidney CYP1A1/1A2 by caffeine in rat. *Biochem Pharmacol* 52:1915–1919.



55. Kerimov I, Ayhan-Kilcigil G, Can-Eke B, Altanlar N, Iscan M (2007) Synthesis, antifungal and antioxidant screening of some novel benzimidazole derivatives. *J Enzyme Inhib Med Chem* 22:696–701.
56. Pasanen M, et al. (1995) The role of CYP enzymes in cocaine-induced liver damage. *Arch Toxicol* 69:287–290.
57. Wang JF, et al. (2002) Induction of cardiac cytochrome p450 in cocaine-treated mice. *Exp Biol Med (Maywood)* 227:182–188.
58. Ueng YF, et al. (2002) The alkaloid rutaecarpine is a selective inhibitor of cytochrome P450 1A in mouse and human liver microsomes. *Drug Metab Dispos* 30:349–353.
59. Ueng YF, Ko HC, Chen CF, Wang JJ, Chen KT (2002) Modulation of drug-metabolizing enzymes by extracts of a herbal medicine *Evodia rutaecarpa* in C57BL/6J mice. *Life Sci* 71:1267–1277.
60. Hümmerich J, Zohm C, Pfau W (2004) Modulation of cytochrome P450 1A1 by food-derived heterocyclic aromatic amines. *Toxicology* 199:231–240.
61. El Gendy MA, El-Kadi AO (2010) Harman induces CYP1A1 enzyme through an aryl hydrocarbon receptor mechanism. *Toxicol Appl Pharmacol* 249:55–64.
62. Reen RK, Roesch SF, Kiefer F, Wiebel FJ, Singh J (1996) Piperine impairs cytochrome P4501A1 activity by direct interaction with the enzyme and not by down regulation of CYP1A1 gene expression in the rat hepatoma 5L cell line. *Biochem Biophys Res Commun* 218:562–569.
63. Lee SK, et al. (2004) Induction of cytochrome P450s by rutaecarpine and metabolism of rutaecarpine by cytochrome P450s. *Planta Med* 70:753–757.
64. Roth MD, et al. (2001) Induction and regulation of the carcinogen-metabolizing enzyme CYP1A1 by marijuana smoke and delta (9)-tetrahydrocannabinol. *Am J Respir Cell Mol Biol* 24:339–344.
65. Chun HS, Kim HJ, Choi EH (2001) Modulation of cytochrome P4501-mediated bioactivation of benzo[a]pyrene by volatile allyl sulfides in human hepatoma cells. *Biosci Biotechnol Biochem* 65:2205–2212.
66. Green M, Newell O, Aboyade-Cole A, Darling-Reed S, Thomas RD (2007) Diallyl sulfide induces the expression of estrogen metabolizing genes in the presence and/or absence of diethylstilbestrol in the breast of female ACI rats. *Toxicol Lett* 168:7–12.
67. Gerhäuser C, et al. (2003) Mechanism-based in vitro screening of potential cancer chemopreventive agents. *Mutat Res* 523-524:163–172.
68. Miao W, Hu L, Kandouz M, Hamilton D, Batist G (2004) A cell-based system to identify and characterize the molecular mechanism of drug-metabolizing enzyme (DME) modulators. *Biochem Pharmacol* 67:1897–1905.
69. Gross-Steinmeyer K, et al. (2004) Phytochemical-induced changes in gene expression of carcinogen-metabolizing enzymes in cultured human primary hepatocytes. *Xenobiotica* 34:619–632.
70. Teel RW, Huynh H (1998) Modulation by phytochemicals of cytochrome P450-linked enzyme activity. *Cancer Lett* 133:135–141.
71. Mahéo K, et al. (1997) Inhibition of cytochromes P-450 and induction of glutathione S-transferases by sulforaphane in primary human and rat hepatocytes. *Cancer Res* 57:3649–3652.
72. Skupinska K, Misiewicz-Krzeminska I, Stypulkowski R, Lubelska K, Kasprzycka-Guttman T (2009) Sulforaphane and its analogues inhibit CYP1A1 and CYP1A2 activity induced by benzo[a]pyrene. *J Biochem Mol Toxicol* 23:18–28.
73. Jellinck PH, Smith G, Newcombe AM (1975) Inhibition of hepatic aryl hydrocarbon hydroxylase by 3-methylcholanthrene, 7,8-benzoflavone and other inducers added in vitro. *Chem Biol Interact* 11:459–468.
74. Wilhelmsson A, Whitelaw ML, Gustafsson JA, Poellinger L (1994) Agonistic and antagonistic effects of alpha-naphthoflavone on dioxin receptor function. Role of the basic region helix-loop-helix dioxin receptor partner factor Arnt. *J Biol Chem* 269:19028–19033.
75. Wen X, Walle UK, Walle T (2005) 5,7-Dimethoxyflavone downregulates CYP1A1 expression and benzo[a]pyrene-induced DNA binding in Hep G2 cells. *Carcinogenesis* 26:803–809.
76. Chan HY, Chen ZY, Tsang DS, Leung LK (2002) Baicalein inhibits DMBA-DNA adduct formation by modulating CYP1A1 and CYP1B1 activities. *Biomed Pharmacother* 56:269–275.
77. Zhang S, Qin C, Safe SH (2003) Flavonoids as aryl hydrocarbon receptor agonists/antagonists: Effects of structure and cell context. *Environ Health Perspect* 111:1877–1882.
78. Chan HY, Wang H, Leung LK (2003) The red clover (*Trifolium pratense*) isoflavone biochanin A modulates the biotransformation pathways of 7,12-dimethylbenz[a]anthracene. *Br J Nutr* 90:87–92.
79. Kim HJ, et al. (2005) Effects of hydroxyl group numbers on the B-ring of 5,7-dihydroxyflavones on the differential inhibition of human CYP 1A and CYP1B1 enzymes. *Arch Pharm Res* 28:1114–1121.
80. Scott LM, et al. (2008) Effects of prior oral contraceptive use and soy isoflavonoids on estrogen-metabolizing cytochrome P450 enzymes. *J Steroid Biochem Mol Biol* 112:179–185.
81. Ciolino HP, Wang TT, Yeh GC (1998) Diosmin and diosmetin are agonists of the aryl hydrocarbon receptor that differentially affect cytochrome P450 1A1 activity. *Cancer Res* 58:2754–2760.
82. Hodek P, et al. (2006) Toxicological aspects of flavonoid interaction with biomacromolecules. *Neuroendocrinol Lett* 27(Suppl 2):14–17.
83. Ahn D, et al. (1996) The effects of dietary ellagic acid on rat hepatic and esophageal mucosal cytochromes P450 and phase II enzymes. *Carcinogenesis* 17:821–828.
84. González-Sarriás A, et al. (2009) Dissimilar in vitro and in vivo effects of ellagic acid and its microbiota-derived metabolites, urolithins, on the cytochrome P450 1A1. *J Agric Food Chem* 57:5623–5632.
85. Sun M, Sakakibara H, Ashida H, Danno G, Kanazawa K (2000) Cytochrome P4501A1-inhibitory action of antimutagenic anthraquinones in medicinal plants and the structure-activity relationship. *Biosci Biotechnol Biochem* 64:1373–1378.
86. Netsch MI, Gutmann H, Schmidlin CB, Aydogan C, Drewe J (2006) Induction of CYP1A by green tea extract in human intestinal cell lines. *Planta Med* 72:514–520.
87. Han EH, et al. (2007) Eugenol inhibit 7,12-dimethylbenz[a]anthracene-induced genotoxicity in MCF-7 cells: Bifunctional effects on CYP1 and NAD(P)H:quinone oxidoreductase. *FEBS Lett* 581:749–756.
88. Rempelberg CJ, Verhagen H, van Bladeren PJ (1993) Effects of the naturally occurring alkenylbenzenes eugenol and trans-anethole on drug-metabolizing enzymes in the rat liver. *Food Chem Toxicol* 31:637–645.
89. Ashida H, Fukuda I, Yamashita T, Kanazawa K (2000) Flavones and flavonols at dietary levels inhibit a transformation of aryl hydrocarbon receptor induced by dioxin. *FEBS Lett* 476:213–217.
90. Zhai S, Dai R, Friedman FK, Vestal RE (1998) Comparative inhibition of human cytochromes P450 1A1 and 1A2 by flavonoids. *Drug Metab Dispos* 26:989–992.
91. Ciolino HP, Yeh GC (1999) The flavonoid galangin is an inhibitor of CYP1A1 activity and an agonist/antagonist of the aryl hydrocarbon receptor. *Br J Cancer* 79:1340–1346.
92. Amakura Y, et al. (2003) Activation of the aryl hydrocarbon receptor by some vegetable constituents determined using in vitro reporter gene assay. *Biol Pharm Bull* 26:532–539.
93. Doostdar H, Burke MD, Mayer RT (2000) Bioflavonoids: Selective substrates and inhibitors for cytochrome P450 CYP1A and CYP1B1. *Toxicology* 144:31–38.
94. Forejtíniková H, et al. (2005) Chemoprotective and toxic potentials of synthetic and natural chalcones and dihydrochalcones in vitro. *Toxicology* 208:81–93.
95. Wang H, Wang Y, Chen ZY, Chan FL, Leung LK (2005) Hydroxychalcones exhibit differential effects on XRE transactivation. *Toxicology* 207:303–313.
96. Kuo I, Chen J, Chang TK (2004) Effect of Ginkgo biloba extract on rat hepatic microsomal CYP1A activity: Role of ginkgolides, bilobalide, and flavonols. *Can J Physiol Pharmacol* 82:57–64.
97. Lu YF, Santostefano M, Cunningham BD, Threadgill MD, Safe S (1995) Identification of 3'-methoxy-4'-nitroflavone as a pure aryl hydrocarbon (Ah) receptor antagonist and evidence for more than one form of the nuclear Ah receptor in MCF-7 human breast cancer cells. *Arch Biochem Biophys* 316:470–477.
98. Zhou J, Gasiewicz TA (2003) 3'-methoxy-4'-nitroflavone, a reported aryl hydrocarbon receptor antagonist, enhances Cyp1a1 transcription by a dioxin responsive element-dependent mechanism. *Arch Biochem Biophys* 416:68–80.
99. Pohl C, Will F, Dietrich H, Schrenk D (2006) Cytochrome P450 1A1 expression and activity in Caco-2 cells: Modulation by apple juice extract and certain apple polyphenols. *J Agric Food Chem* 54:10262–10268.
100. Chang TK, Chen J, Yeung EY (2006) Effect of Ginkgo biloba extract on procarcinogen-bioactivating human CYP1 enzymes: Identification of isorhamnetin, kaempferol, and quercetin as potent inhibitors of CYP1B1. *Toxicol Appl Pharmacol* 213:18–26.
101. Ciolino HP, Daschner PJ, Yeh GC (1999) Dietary flavonols quercetin and kaempferol are ligands of the aryl hydrocarbon receptor that affect CYP1A1 transcription differentially. *Biochem J* 340:715–722.
102. Baumgart A, Schmidt H, Schmitz HJ, Schrenk D (2005) Natural furocoumarins as inducers and inhibitors of cytochrome P450 1A1 in rat hepatocytes. *Biochem Pharmacol* 69:657–667.
103. Cai Y, et al. (1996) Mechanism-based inactivation of hepatic ethoxycoumarin O-dealkylation activity by naturally occurring coumarins. *Chem Res Toxicol* 9:729–736.
104. Kleiner HE, et al. (2001) Oral administration of naturally occurring coumarins leads to altered phase I and II enzyme activities and reduced DNA adduct formation by polycyclic aromatic hydrocarbons in various tissues of SENCAR mice. *Carcinogenesis* 22:73–82.
105. Reicks MM, Crankshaw D (1993) Effects of D-limonene on hepatic microsomal monooxygenase activity and paracetamol-induced glutathione depletion in mouse. *Xenobiotica* 23:809–819.
106. Ciolino HP, Daschner PJ, Wang TT, Yeh GC (1998) Effect of curcumin on the aryl hydrocarbon receptor and cytochrome P450 1A1 in MCF-7 human breast carcinoma cells. *Biochem Pharmacol* 56:197–206.
107. Oetari S, Sudibyo M, Commandeur JN, Samhoedi R, Vermeulen NP (1996) Effects of curcumin on cytochrome P450 and glutathione S-transferase activities in rat liver. *Biochem Pharmacol* 51:39–45.
108. Kim EY, et al. (2004) Non-specific inhibition of human cytochrome P450-catalyzed reactions by hemin. *Toxicol Lett* 153:239–246.
109. Sinal CJ, Bend JR (1997) Aryl hydrocarbon receptor-dependent induction of cyp1a1 by bilirubin in mouse hepatoma hepa 1c1c7 cells. *Mol Pharmacol* 52:590–599.

110. Chen I, Safe S, Bjeldanes L (1996) Indole-3-carbinol and diindolylmethane as aryl hydrocarbon (Ah) receptor agonists and antagonists in T47D human breast cancer cells. *Biochem Pharmacol* 51:1069–1076.
111. Jellinck PH, et al. (1993) Ah receptor binding properties of indole carbinols and induction of hepatic estradiol hydroxylation. *Biochem Pharmacol* 45:1129–1136.
112. Chang TK, Chen J, Yang G, Yeung EY (2010) Inhibition of procarcinogen-bioactivating human CYP1A1, CYP1A2 and CYP1B1 enzymes by melatonin. *J Pineal Res* 48:55–64.
113. Heath-Pagliuso S, et al. (1998) Activation of the Ah receptor by tryptophan and tryptophan metabolites. *Biochemistry* 37:11508–11515.
114. Adams NH, Levi PE, Hodgson E (1993) Regulation of cytochrome P-450 isozymes by methylenedioxyphenyl compounds. *Chem Biol Interact* 86:255–274.
115. Fouin-Fortunet H, et al. (1986) Inactivation of cytochrome P-450 by the drug methoxsalen. *J Pharmacol Exp Ther* 236:237–247.
116. Hodgson E, Ryu DY, Adams N, Levi PE (1995) Biphasic responses in synergistic interactions. *Toxicology* 105:211–216.
117. Ueng YF, Hsieh CH, Don MJ (2005) Inhibition of human cytochrome P450 enzymes by the natural hepatotoxin safrole. *Food Chem Toxicol* 43:707–712.
118. Breinholt V, Lauridsen ST, Daneshvar B, Jakobsen J (2000) Dose-response effects of lycopene on selected drug-metabolizing and antioxidant enzymes in the rat. *Cancer Lett* 154:201–210.
119. Kowalczyk MC, et al. (2009) Differential effects of several phytochemicals and their derivatives on murine keratinocytes in vitro and in vivo: Implications for skin cancer prevention. *Carcinogenesis* 30:1008–1015.
120. Chen YT, Ding JH (1987) Vitamins E and K induce aryl hydrocarbon hydroxylase activity in human cell cultures. *Biochem Biophys Res Commun* 143:863–871.
121. Inouye K, Mae T, Kondo S, Ohkawa H (1999) Inhibitory effects of vitamin A and vitamin K on rat cytochrome P4501A1-dependent monooxygenase activity. *Biochem Biophys Res Commun* 262:565–569.
122. Arukwe A, Nordbø B (2008) Hepatic biotransformation responses in Atlantic salmon exposed to retinoic acids and 3,3',4,4'-tetrachlorobiphenyl (PCB congener 77). *Comp Biochem Physiol C Toxicol Pharmacol* 147:470–482.
123. Sidorova YA, Grishanova AY (2005) Inhibitory effect of alpha-tocopherol on benzo(a)pyrene-induced CYP1A1 activity in rat liver. *Bull Exp Biol Med* 140:517–520.
124. Hirose M, et al. (1999) Chemoprevention of heterocyclic amine-induced carcinogenesis by phenolic compounds in rats. *Cancer Lett* 143:173–178.
125. Baer-Dubowska W, Gnojekowski J, Fenrych W (1997) Effect of tannic acid on benzo[a]pyrene-DNA adduct formation in mouse epidermis: Comparison with synthetic gallic acid esters. *Nutr Cancer* 29:42–47.
126. Baer-Dubowska W, Szaefer H, Krajka-Kuzniak V (1998) Inhibition of murine hepatic cytochrome P450 activities by natural and synthetic phenolic compounds. *Xenobiotica* 28:735–743.
127. Hanioka N, Jinno H, Tanaka-Kagawa T, Nishimura T, Ando M (2000) Interaction of bisphenol A with rat hepatic cytochrome P450 enzymes. *Chemosphere* 41:973–978.
128. Nishizawa H, Imanishi S, Manabe N (2005) Effects of exposure in utero to bisphenol a on the expression of aryl hydrocarbon receptor, related factors, and xenobiotic metabolizing enzymes in murine embryos. *J Reprod Dev* 51:593–605.
129. Bonefeld-Jørgensen EC, Long M, Hofmeister MV, Vinggaard AM (2007) Endocrine-disrupting potential of bisphenol A, bisphenol A dimethacrylate, 4-n-nonylphenol, and 4-n-ethylphenol in vitro: New data and a brief review. *Environ Health Perspect* 115(Suppl 1):69–76.
130. Lee PC, Patra SC, Stelloh CT, Lee W, Struve M (1996) Interaction of nonylphenol and hepatic CYP1A in rats. *Biochem Pharmacol* 52:885–889.
131. Nakari T, Huhtala S (2010) In vivo and in vitro toxicity of decabromodiphenyl ethane, a flame retardant. *Environ Toxicol* 25:333–338.
132. Zhou T, Ross DG, DeVito MJ, Crofton KM (2001) Effects of short-term in vivo exposure to polybrominated diphenyl ethers on thyroid hormones and hepatic enzyme activities in weanling rats. *Toxicol Sci* 61:76–82.
133. Haag M, et al. (2002) Increased expression and decreased activity of cytochrome P450 1A1 in a murine model of toluene diisocyanate-induced asthma. *Arch Toxicol* 76:621–627.
134. Bozcaarmutlu A, Arınc E (2004) Inhibitory effects of divalent metal ions on liver microsomal 7-ethoxyresorufin O-deethylase (EROD) activity of leaping mullet. *Mar Environ Res* 58:521–524.
135. Dehn PF, White CM, Connors DE, Shipkey G, Cumbo TA (2004) Characterization of the human hepatocellular carcinoma (hepg2) cell line as an in vitro model for cadmium toxicity studies. *In Vitro Cell Dev Biol Anim* 40:172–182.
136. Elbekai RH, El-Kadi AO (2007) Transcriptional activation and posttranscriptional modification of Cyp1a1 by arsenite, cadmium, and chromium. *Toxicol Lett* 172:106–119.
137. Oliveira M, Santos MA, Pacheco M (2004) Glutathione protects heavy metal-induced inhibition of hepatic microsomal ethoxyresorufin O-deethylase activity in *Dicentrarchus labrax* L. *Ecotoxicol Environ Saf* 58:379–385.
138. Korashy HM, El-Kadi AO (2005) Regulatory mechanisms modulating the expression of cytochrome P450 1A1 gene by heavy metals. *Toxicol Sci* 88:39–51.
139. Moorthy B, Parker KM, Smith CV, Bend JR, Welty SE (2000) Potentiation of oxygen-induced lung injury in rats by the mechanism-based cytochrome P-450 inhibitor, 1-aminobenzotriazole. *J Pharmacol Exp Ther* 292:553–560.
140. Okamoto T, Mitsuhashi M, Fujita I, Sindhu RK, Kikkawa Y (1993) Induction of cytochrome P450 1A1 and 1A2 by hyperoxia. *Biochem Biophys Res Commun* 197:878–885.
141. McMillan BJ, Bradford CA (2007) The aryl hydrocarbon receptor is activated by modified low-density lipoprotein. *Proc Natl Acad Sci USA* 104:1412–1417.
142. Thum T, Borlak J (2004) Mechanistic role of cytochrome P450 monooxygenases in oxidized low-density lipoprotein-induced vascular injury: Therapy through LOX-1 receptor antagonism? *Circ Res* 94:e1–e13.
143. Afaq F, et al. (2009) Aryl hydrocarbon receptor is an ozone sensor in human skin. *J Invest Dermatol* 129:2396–2403.
144. Delaunois A, et al. (1999) Interactions between cytochrome P-450 activities and ozone-induced modulatory effects on endothelial permeability in rabbit lungs: Influence of gender. *Inhal Toxicol* 11:999–1014.
145. Abass K, Reponen P, Turpeinen M, Jalonen J, Pelkonen O (2007) Characterization of diuron N-demethylation by mammalian hepatic microsomes and cDNA-expressed human cytochrome P450 enzymes. *Drug Metab Dispos* 35:1634–1641.
146. Takeuchi S, Iida M, Yabushita H, Matsuda T, Kojima H (2008) In vitro screening for aryl hydrocarbon receptor agonistic activity in 200 pesticides using a highly sensitive reporter cell line, DR-EcoScreen cells, and in vivo mouse liver cytochrome P450-1A induction by propanil, diuron and linuron. *Chemosphere* 74:155–165.
147. Onderwater RC, Commandeur JN, Menge WM, Vermeulen NP (1999) Activation of microsomal glutathione S-transferase and inhibition of cytochrome P450 1A1 activity as a model system for detecting protein alkylation by thiourea-containing compounds in rat liver microsomes. *Chem Res Toxicol* 12:396–402.
148. Wang WD, Wang Y, Wen HJ, Buhler DR, Hu CH (2004) Phenylthiourea as a weak activator of aryl hydrocarbon receptor inhibiting 2,3,7,8-tetrachlorodibenzo-p-dioxin-induced CYP1A1 transcription in zebrafish embryo. *Biochem Pharmacol* 68:63–71.
149. Snegaroff J, Bach J (1989) Effects of the fungicide prochloraz on xenobiotic metabolism in rainbow trout: Inhibition in vitro and time course of induction in vivo. *Xenobiotica* 19:255–267.
150. Lédirac N, et al. (1997) Carbaryl induces CYP1A1 gene expression in HepG2 and HaCaT cells but is not a ligand of the human hepatic Ah receptor. *Toxicol Appl Pharmacol* 144:177–182.
151. Usmani KA, Cho TM, Rose RL, Hodgson E (2006) Inhibition of the human liver microsomal and human cytochrome P450 1A2 and 3A4 metabolism of estradiol by deployment-related and other chemicals. *Drug Metab Dispos* 34:1606–1614.
152. Ellero S, et al. (2010) Xenobiotic-metabolizing cytochromes p450 in human white adipose tissue: Expression and induction. *Drug Metab Dispos* 38:679–686.
153. Almeida JR, Oliveira C, Gravato C, Guilhermino L (2010) Linking behavioural alterations with biomarkers responses in the European seabass *Dicentrarchus labrax* L. exposed to the organophosphate pesticide fenitrothion. *Ecotoxicology* 19:1369–1381.
154. Coumoul X, Diry M, Robillot C, Barouki R (2001) Differential regulation of cytochrome P450 1A1 and 1B1 by a combination of dioxin and pesticides in the breast tumor cell line MCF-7. *Cancer Res* 61:3942–3948.
155. Dehn PF, Allen-Mocheherie S, Kerek J, Thenappan A (2005) Organochlorine insecticides: Impacts on human HepG2 cytochrome P4501A, 2B activities and glutathione levels. *Toxicol In Vitro* 19:261–273.
156. Harvey JL, Paine AJ, Wright MC (1998) Disruption of endogenous regulator homeostasis underlies the mechanism of rat CYP1A1 mRNA induction by metyrapone. *Biochem J* 331:273–281.
157. Merrill CL, et al. (2002) Etomoxir-induced oxidative stress in HepG2 cells detected by differential gene expression is confirmed biochemically. *Toxicol Sci* 68:93–101.
158. Alexander DL, Zhang L, Foroozesh M, Alworth WL, Jefcoate CR (1999) Metabolism-based polycyclic aromatic acetylene inhibition of CYP1B1 in 10T1/2 cells potentiates aryl hydrocarbon receptor activity. *Toxicol Appl Pharmacol* 161:123–139.
159. Liu H, Santostefano M, Safe S (1994) 2-Phenylphenanthridinone and related compounds: Aryl hydrocarbon receptor agonists and suicide inactivators of P4501A1. *Arch Biochem Biophys* 313:206–214.
160. Grafstöm R, Støhs SJ (1981) Inhibitors of 7-ethoxyresorufin and 7-ethoxycoumarin O-deethylases in rat small intestinal microsomes and cells. *Drug Chem Toxicol* 4:147–159.
161. Jeong TC, et al. (2004) Skf 525-A induces cocaine N-demethylase, ethoxyresorufin O-deethylase, and pentoxifyresorufin O-dealkylase activities by induction of cytochrome p-450 2B in female B6C3F1 mice. *J Toxicol Environ Health A* 67:1955–1970.
162. Andrieux L, et al. (2004) Aryl hydrocarbon receptor activation and cytochrome P450 1A induction by the mitogen-activated protein kinase inhibitor U0126 in hepatocytes. *Mol Pharmacol* 65:934–943.
163. Beierschmitt WP, et al. (2001) Induction of hepatic microsomal drug-metabolizing enzymes by inhibitors of 5-lipoxygenase (5-LO): Studies in rats and 5-LO knockout mice. *Toxicol Sci* 63:15–21.
164. Lu P, et al. (2003) Mechanism-based inhibition of human liver microsomal cytochrome P450 1A2 by zileuton, a 5-lipoxygenase inhibitor. *Drug Metab Dispos* 31:1352–1360.

**Table S2. Viability of HaCaT cells exposed to inhibitors of CYP1A in commercial DMEM (Com) or in DMEM prepared with purified tryptophan (Pure)**

| Compound (concentration)             | Viability*  |             |
|--------------------------------------|-------------|-------------|
|                                      | Com         | Pure        |
| TCDD (1 nM)                          | 101 ± 1.44  | 99.2 ± 4.12 |
| Trioxalen (1 μM)                     | 95.6 ± 1.99 | 94.2 ± 2.40 |
| Ketoconazole (10 μM)                 | 103 ± 2.85  | 100 ± 0.93  |
| Ellipticine (0.05 μM)                | 92.3 ± 4.93 | 102 ± 1.84  |
| Genistein (10 μM)                    | 98.3 ± 1.74 | 99.9 ± 2.65 |
| Diosmin (10 μM)                      | 98.2 ± 3.62 | 101 ± 4.07  |
| α-NF (0.25 μM)                       | 103 ± 2.22  | 97.7 ± 1.88 |
| Cycloheximide (18 μM)                | 88.0 ± 1.11 | 86.5 ± 2.06 |
| α-Tocopherol (50 μM)                 | 99.2 ± 1.69 | 100 ± 1.52  |
| MNF (2.5 μM)                         | 100 ± 3.03  | 104 ± 2.00  |
| H <sub>2</sub> O <sub>2</sub> (2 mM) | 88.7 ± 4.37 | 94.2 ± 3.74 |
| UVB (20 mJ/cm <sup>2</sup> )         | 98.4 ± 3.46 | 100 ± 1.09  |

\*Percent metabolically active cells as assessed with the Alamar Blue assay after 48 h of culturing; means ± SE of triplicate measurements from two independent cell cultures.
